# Supplementary material for: Emergence of surfactant-free micelles from ternary solutions
Source: Royal Society of Chemistry journal article supplement (doi:10.1039/c4sc00153b), 2014-01-01
Supplement: c4sc00153b1.pdf [file c4sc00153b1.pdf]

## Supplementary Information

### Emergence of surfactant-free Micelles from Ternary Solutions

S. Schöttl<sup>1</sup>, J. Marcus<sup>1</sup>, O. Diat<sup>2</sup>, D. Touraud<sup>1</sup>, W. Kunz<sup>1</sup>, T. Zemb<sup>2,\*</sup>, D. Horinek<sup>1,\*</sup>

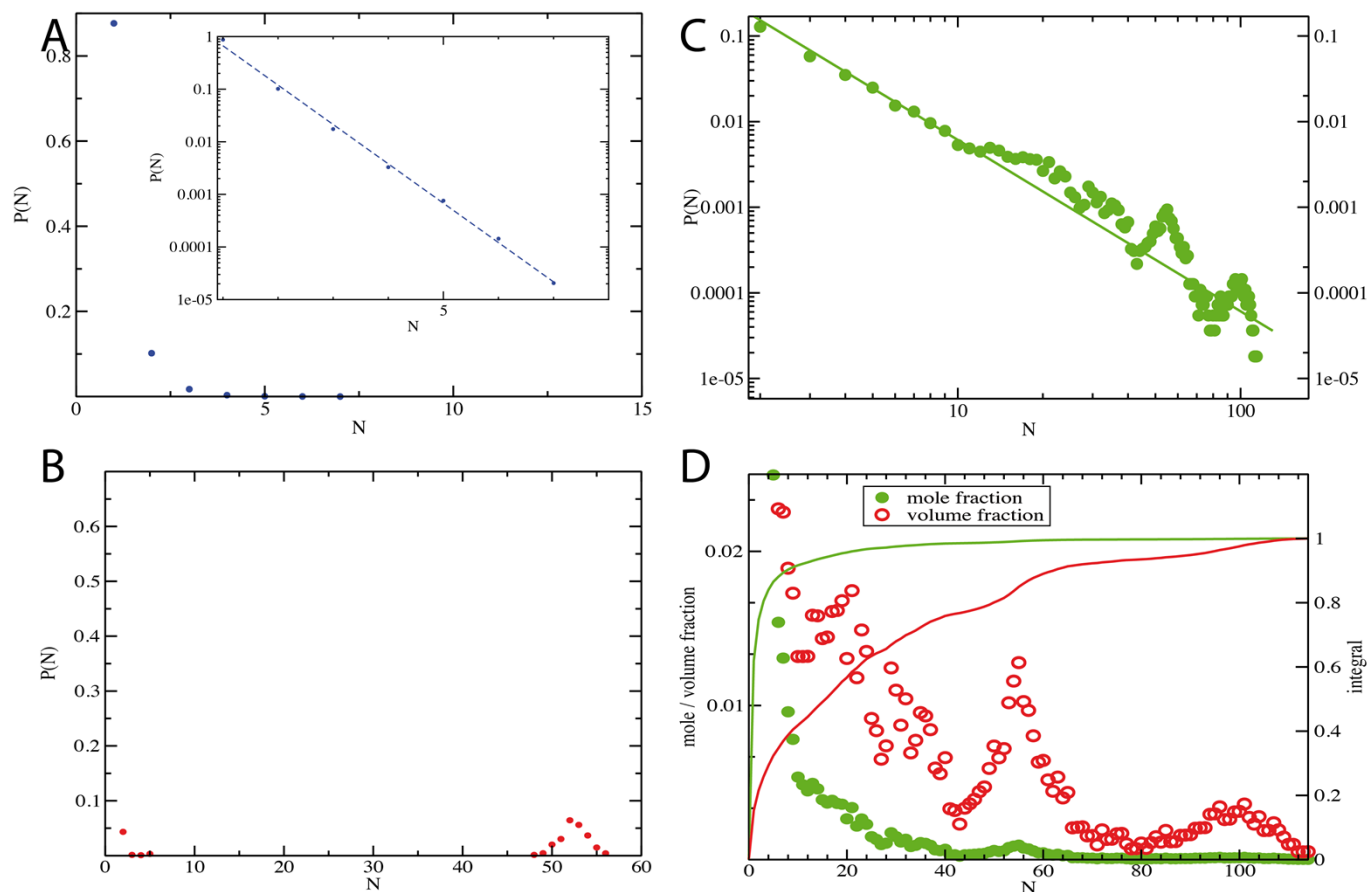

Figure S1: Histogram of aggregate sizes as they are determined by the number of octanol molecules in an aggregate. An alternative cutoff radius of 0.48 nm is used during the aggregate determination. Compare to Figure 2 in the manuscript, where a cutoff radius of 0.78 nm is applied.

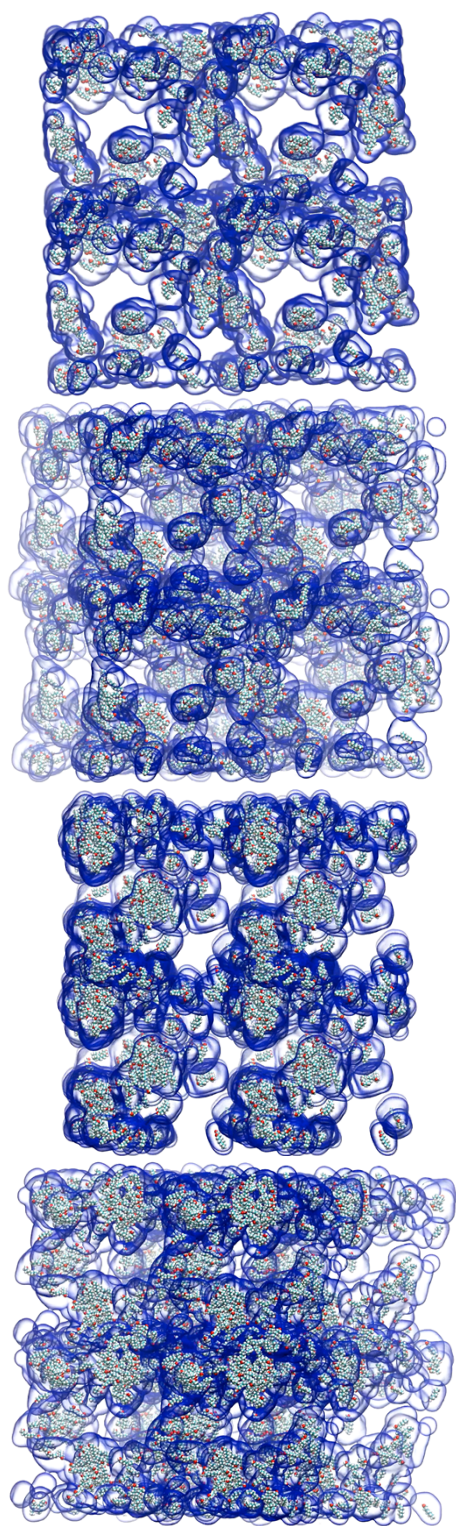

Figure S2: Snapshot of the large  $x_E = 0.2$  simulation. Shown is a  $2 \times 2 \times 2$  superbox of the simulation system. Looking at the octanol molecules alone (shown in VDW representation), the clusters are clearly isolated. When the bound ethanol molecules are taken into account (visualized with an additional 'skin' to account for the cutoff criterion as transparent blue surface), the clusters are still finite, but the system is close to forming a bicontinuous structure). The frames are rotated by consecutive 45 degree steps.
